# Supplementary material for: An MnO2–Ti3C2Tx MXene nanohybrid: an efficient and durable electrocatalyst toward artificial N2 fixation to NH3 under ambient conditions
Source: Royal Society of Chemistry journal article supplement (doi:10.1039/c9ta04902a), 2019-01-01
Supplement: c9ta04902a1.pdf [file c9ta04902a1.pdf]

## Electronic Supplementary Information

### Experimental section

#### Materials

Ti<sub>3</sub>AlC<sub>2</sub> was purchased from Laizhou KaiXi Ceramic Materials Company Ltd. Nafion (5 wt%) was purchased from Sigma-Aldrich Chemical Reagent Co., Ltd. Hydrochloric acid (HCl), and ethanol (C<sub>2</sub>H<sub>5</sub>OH) were purchased from Chengdu Kelong Chemical Reagent Factory. Manganese sulfate (MnSO<sub>4</sub>), potassium permanganate (KMnO<sub>4</sub>), Sodium salicylate (C<sub>7</sub>O<sub>3</sub>H<sub>5</sub>Na), sodium hypochlorite (NaClO), sodium nitroferricyanide dihydrate (C<sub>5</sub>FeN<sub>6</sub>Na<sub>2</sub>O·2H<sub>2</sub>O), para-(dimethylamino) benzaldehyde (p-C<sub>9</sub>H<sub>11</sub>NO), and hydrazine monohydrate (N<sub>2</sub>H<sub>4</sub>·H<sub>2</sub>O) were purchased from Aladdin Ltd. (Shanghai, China). The water used throughout all experiments was purified through a Millipore system. All chemicals were used as received without further purification.

#### Synthesis of Ti<sub>3</sub>C<sub>2</sub>T<sub>x</sub>

Ti<sub>3</sub>C<sub>2</sub>T<sub>x</sub> was synthesized by etching of the MAX Ti<sub>3</sub>AlC<sub>2</sub> material based on the previous report method.<sup>1</sup> Typically, 5.0 g Ti<sub>3</sub>AlC<sub>2</sub> particles were immersed in 80 mL 40% HF solution under magnetic stirring at room temperature for 48 h. After corrosion, the resultant precipitates were repeatedly washed with deionized water and centrifuged at 3500 rpm for 5 min, until the supernatant reached a pH of approximate 6 and then washed by absolute ethanol at least three times. The acquired sediment was dried at room temperature for 90 h. Subsequently, 0.5 g of as-prepared Ti<sub>3</sub>C<sub>2</sub>T<sub>x</sub> powder was dispersed in 250 mL distilled water forming a suspension, deaerated with Ar, followed by sonication under for 1 h. Thereafter, the suspension was centrifuged at 3500 rpm for 1 h and the supernatant was collected.<sup>2</sup> Finally, the resulting product can be obtained by freeze-dried.

#### Synthesis of MnO<sub>2</sub>-Ti<sub>3</sub>C<sub>2</sub>T<sub>x</sub>

In the present work, MnO<sub>2</sub> was deposited over Ti<sub>3</sub>C<sub>2</sub>T<sub>x</sub> nanosheet by direct chemical synthesis.<sup>3</sup> Typically, 200 mg of Ti<sub>3</sub>C<sub>2</sub>T<sub>x</sub> were dispersed in 35 mL of an aqueous solution, containing 10 mM of MnSO<sub>4</sub>, by sonication for 30 min. To allow impregnation of the Ti<sub>3</sub>C<sub>2</sub>T<sub>x</sub> by MnSO<sub>4</sub>, the suspension was then maintained at a controlled temperature of 60 °C for 30

min under magnetic stirring. A 150 mL aqueous solution containing 33 mM of  $\text{KMnO}_4$  was previously heated at controlled 60 °C, and then slowly added to the agitated suspension. This mixture was maintained at 60 °C under agitation for 15 min and then washed, filtered and vacuum dried at 80 °C for approximately 10 h. For comparison, pure  $\text{MnO}_2$  was also prepared by a similar procedure.

### **Preparation of $\text{MnO}_2\text{-Ti}_3\text{C}_2\text{T}_x/\text{CP}$ electrode**

$\text{MnO}_2\text{-Ti}_3\text{C}_2\text{T}_x/\text{CP}$  was prepared as following: First, 5 mg of  $\text{MnO}_2\text{-Ti}_3\text{C}_2\text{T}_x$  composites and 20  $\mu\text{L}$  of Nafion solution (5 wt%) were dispersed in 980  $\mu\text{L}$  mixed solution contain ethanol and  $\text{H}_2\text{O}$  (V:V=2:1) by 1 h sonication to form a homogeneous ink. Then 20  $\mu\text{L}$  catalyst ink was loaded on a  $1\times 1\text{ cm}^2$  carbon paper (CP) and dried under ambient condition for measurement.

### **Characterizations**

XRD patterns were obtained from a Shimazu XRD-6100 diffractometer with  $\text{Cu K}\alpha$  radiation (40 kV, 30 mA) of wavelength 0.154 nm (Japan). TEM images were obtained from a Zeiss Libra 200FE transmission electron microscope operated at 200 kV. XPS measurements were performed on an ESCALABMK II X-ray photoelectron spectrometer using Mg as the exciting source. The UV-Vis absorbance spectra were measured on a SHIMADZU UV-1800 UV-Vis spectrophotometer. The ion chromatography data were collected on Thermofisher ICS 5000 plus using the dual temperature heater, injection valve, conductivity detector, AERS 500 Anions suppressor. Brunauer–Emmett–Teller (BET) specific surface areas were measured by using Autosorb-IQ-MP-C system (Quantachrome, USA).

### **Electrochemical measurements**

The electrochemical performance measurement was performed in a two-compartment cell separated by Nafion membrane using a CHI 660E electrochemical analyzer (CHI Instruments, Inc., Shanghai). Before NRR test, Nafion membrane was protonated by boiling in water a  $\text{H}_2\text{O}_2$  for 1 h, then in water for another hour, followed by 1 h in 0.5 M  $\text{H}_2\text{SO}_4$ , and finally for 1 h in water. All steps were performed at 80 °C. The  $\text{MnO}_2\text{-Ti}_3\text{C}_2\text{T}_x/\text{CP}$  was used as the working electrode, a graphite rod as the counter electrode and  $\text{Ag}/\text{AgCl}$  electrode as the

reference. All experiments were performed at ambient conditions. Before the NRR measurements, the HCl electrolyte (0.1 M) was bubbled with high-purity N<sub>2</sub> (99.999%) for 20 min. For N<sub>2</sub> reduction experiments, potentiostatic test was conducted in N<sub>2</sub>-saturated 0.1 M HCl solution. N<sub>2</sub> was continuously fed into the cathodic compartment with a properly positioned sparger during the experiments. All potentials reported in this work were calibrated to RHE, using the following equation:

$$E \text{ (RHE)} = E \text{ (Ag/AgCl)} + 0.059 \times \text{pH} + E^\circ \text{ (Ag/AgCl)}$$

### **Determination of NH<sub>3</sub>**

NH<sub>3</sub> concentration was detected by the indophenol blue method.<sup>4</sup> In detail, 2 mL electrolyte was obtained from the cathodic chamber, and then 2 mL of 1 M NaOH solution (contains 5 wt% salicylic acid and 5 wt% sodium citrate) was added into this solution. Subsequently, 1 mL of 0.05 M sodium hypochlorite and 0.2 mL of sodium nitroferricyanide (1 wt%) were added into the above solution. After standing at room temperature for 2 h, the UV-Vis absorption spectrum was measured at a wavelength of 655 nm. The concentration-absorbance curves were calibrated using standard NH<sub>4</sub>Cl solution (0.1 M HCl solution as mother solution) with a series of concentrations. The fitting curve ( $y = 0.359 x + 0.051$ ,  $R^2 = 0.999$ ) shows good linear relation of absorbance value with NH<sub>3</sub> concentration by three times independent calibrations. The NH<sub>3</sub> concentration was calculated from the calibration curve, and the rate of NH<sub>3</sub> yield was calculated using the following equation:

$$V_{\text{NH}_3} \text{ (}\mu\text{g h}^{-1} \text{ mg}_{\text{cat.}}^{-1}\text{)} = (c_{\text{NH}_3} \times V) / (17 \times t \times m_{\text{cat.}})$$

where  $c_{\text{NH}_3}$  ( $\mu\text{g mL}^{-1}$ ) is the measured NH<sub>3</sub> concentration,  $V$  (mL) is the volume of electrolyte (in our work 35 mL),  $t$  (s) is the reduction reaction time and  $m_{\text{cat.}}$  (mg) is the mass loading of catalyst on CP

### **Determination of N<sub>2</sub>H<sub>4</sub>**

Concentration of N<sub>2</sub>H<sub>4</sub> in the electrolyte was determined by the method of Watt and Chrisp.<sup>5</sup> Typically, a mixture solution containing p-C<sub>9</sub>H<sub>11</sub>NO (5.99 g), concentrated HCl (30 mL) and C<sub>2</sub>H<sub>5</sub>OH (300 mL) was used as a color reagent. In detail, 5 mL electrolyte removed from the cathodic chamber was added into 5 mL above prepared color reagent and standing 15 min at room temperature. UV-Vis absorption spectra were measured at a wavelength of 455 nm. The

obtained calibration curve of  $\text{N}_2\text{H}_4$  is  $y = 0.76x + 0.04$ ,  $R^2 = 0.999$ .

### Calculations of FE

FE in 0.1 M HCl was calculated according to following equation:

$$\text{FE} = 3 \times F \times c_{\text{NH}_3} \times V / (17 \times Q) \times 100\%$$

Where  $F$  is Faraday constant ( $96500 \text{ C mol}^{-1}$ );  $Q$  (C) is the quantity of applied electricity.

### DFT calculation

Spin-polarized density function theory (DFT) was employed in all computations using Vienna Ab-initio Simulation Package (VASP).<sup>6</sup> The electron exchange was described by the Perdew-Burke-Ernzerhof (PBE) function along with a generalized gradient approximation (GGA).<sup>7,8</sup> The projector augmented wave (PAW) method was used to describe the electron-ion interaction. The kinetic energy cutoff for plane wave was chosen as 400 eV.<sup>9</sup> The Brillouin zone was sampled by using a  $3 \times 3 \times 1$  k-points grid. Then the structures were optimized until the atomic energy reached an energy convergence threshold of  $10^{-4}$  eV and the force of each atom was lower than the criterion of  $0.05 \text{ eV/\AA}$ . The structure was modeled by using an unit cell of (110) surface of  $\text{MnO}_2$  and a  $3 \times 1 \times 1$  supercell of  $\text{Ti}_3\text{C}_2$  MXene. A vacuum space of 20 Å in the z-direction was introduced to eliminate the mutual effect of different layers.

The distal reaction pathway was utilized to investigate the reaction process of NRR. For each intermediate step, the change of Gibbs free energy,  $\Delta G$ , was given by

$$\Delta G = \Delta E + \Delta ZPE - T\Delta S - eU \quad (1)$$

where  $\Delta E$  is the difference of calculated DFT energy.  $ZPE$  is zero-point energy, which was calculated from the vibrational frequency.  $T$  is the temperature, used as 298.15 K.  $eU$  is the contribution of free energy from the electrode potential  $U$  in the proton transfer steps. Charge transfer analysis was performed by utilizing Bader Charge Analysis method.

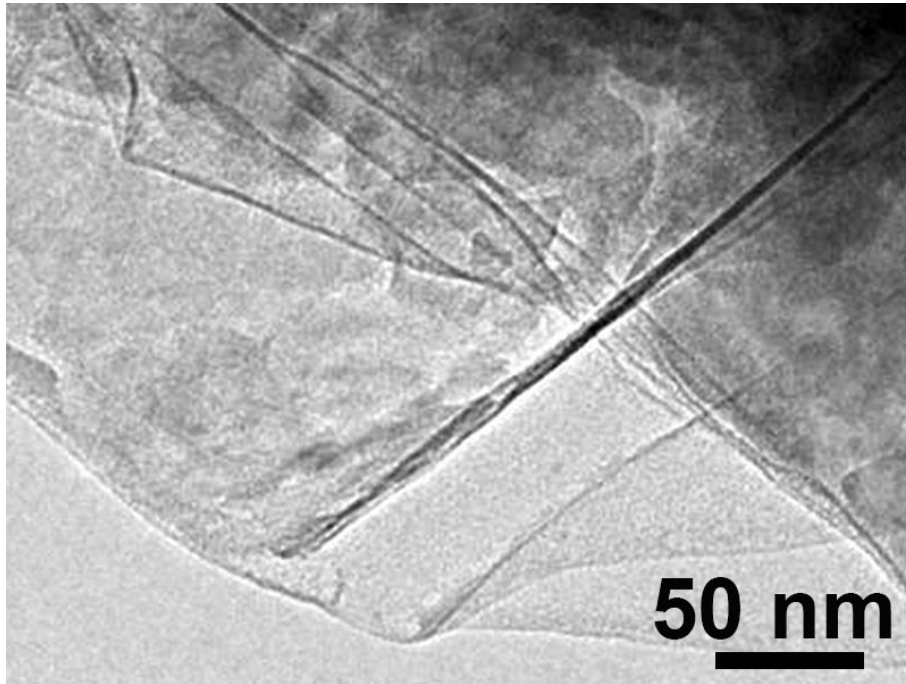

**Fig. S1.** TEM image of Ti<sub>3</sub>C<sub>2</sub>T<sub>x</sub> nanosheet.

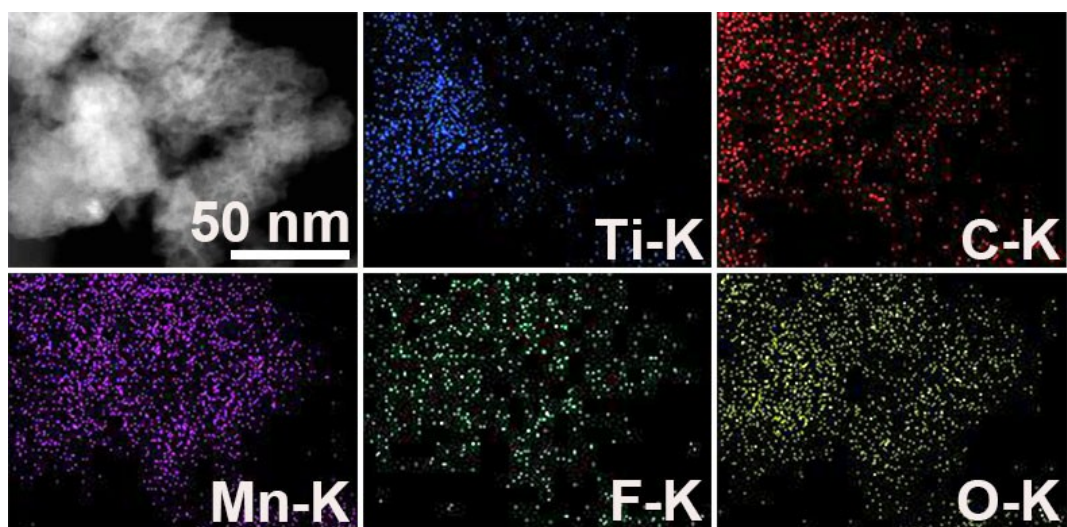

**Fig. S2.** TEM image and corresponding EDX elemental mapping images of Ti, C, Mn, F, and O for  $\text{MnO}_2\text{-Ti}_3\text{C}_2\text{T}_x$ .

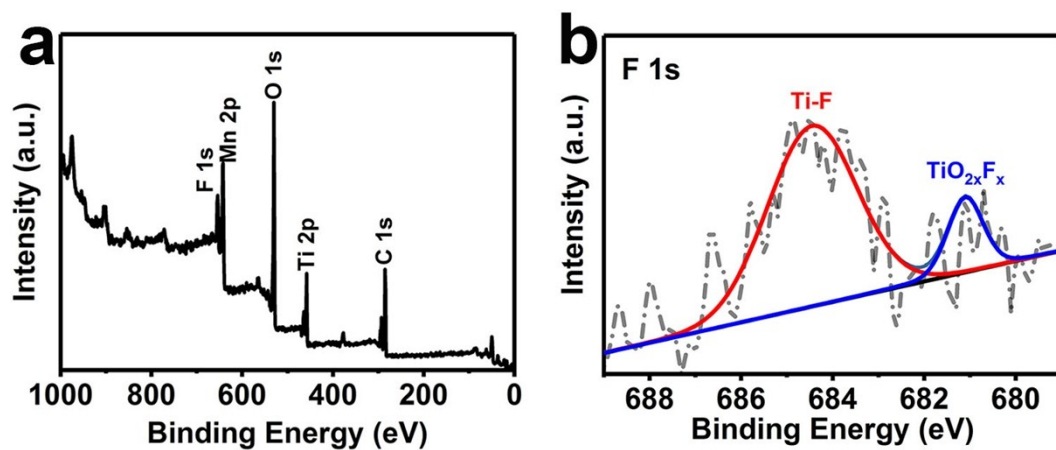

**Fig. S3.** (a) XPS survey spectrum of MnO<sub>2</sub>-Ti<sub>3</sub>C<sub>2</sub>T<sub>x</sub> NS. (b) XPS spectrum for MnO<sub>2</sub>-Ti<sub>3</sub>C<sub>2</sub>T<sub>x</sub> in the F 1s.

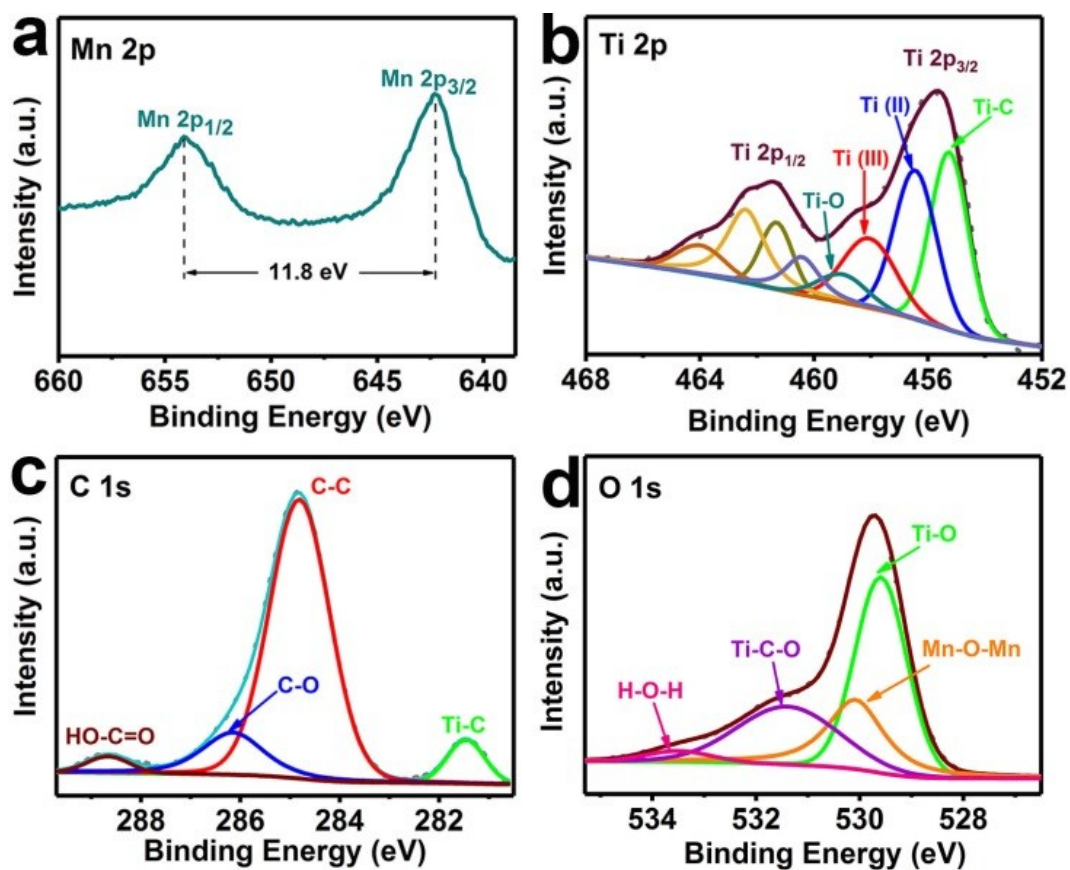

**Fig. S4.** XPS spectra for MnO<sub>2</sub>-Ti<sub>3</sub>C<sub>2</sub>T<sub>x</sub> in the (a) Mn 2p, (b) Ti 2p, (c) C 1s, and (d) O 1s regions



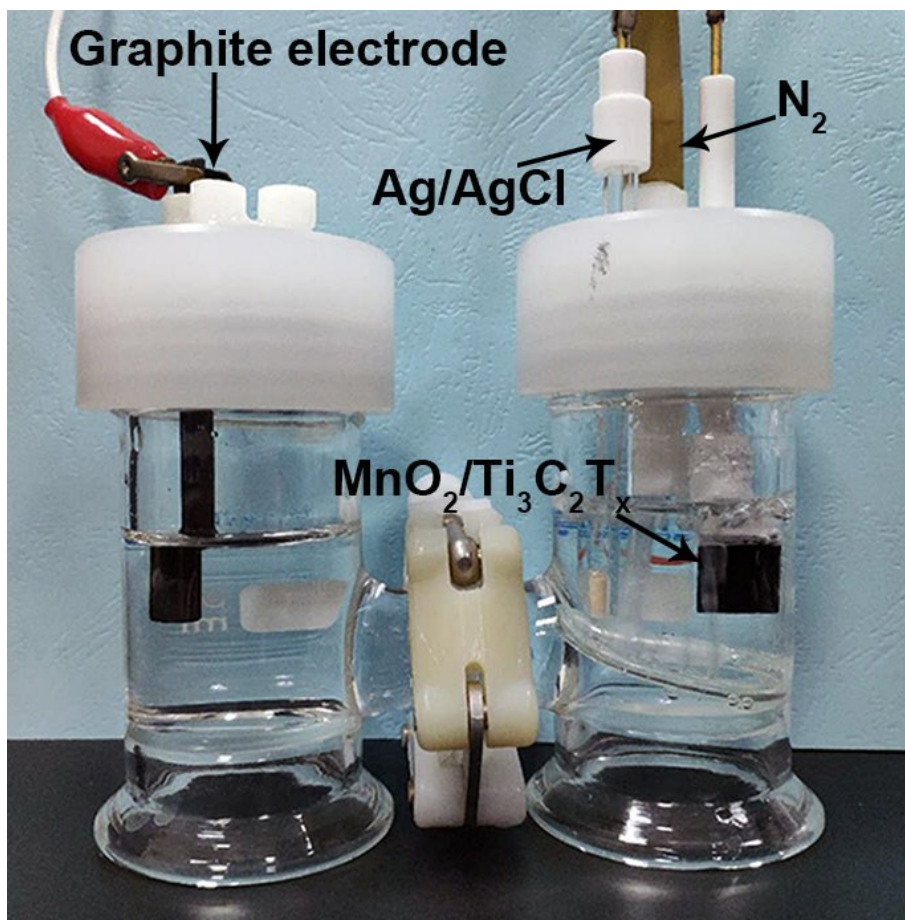

**Fig. S5.** Optical photograph of the reaction vessel.

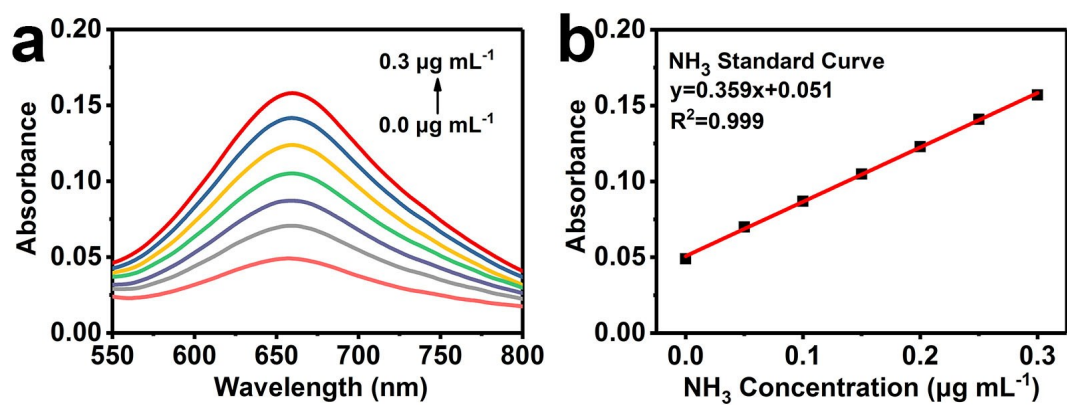

**Fig. S6.** (a) UV-Vis absorption spectra of various  $\text{NH}_3$  concentrations after incubated for 2 h at room temperature. (b) Calibration curve used for calculation of  $\text{NH}_3$  concentrations.

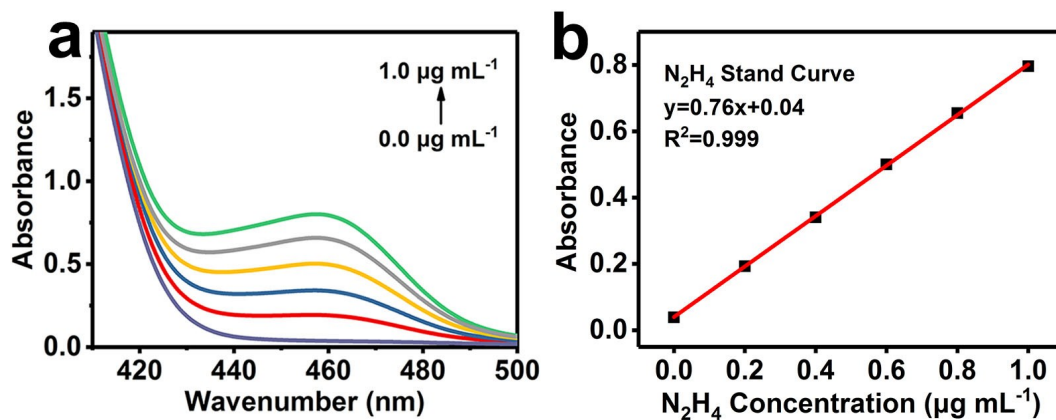

**Fig. S7.** (a) UV-Vis absorption spectra of various  $N_2H_4$  concentrations after incubated for 20 min at room temperature. (b) Calibration curve used for calculation of  $N_2H_4$  concentrations.

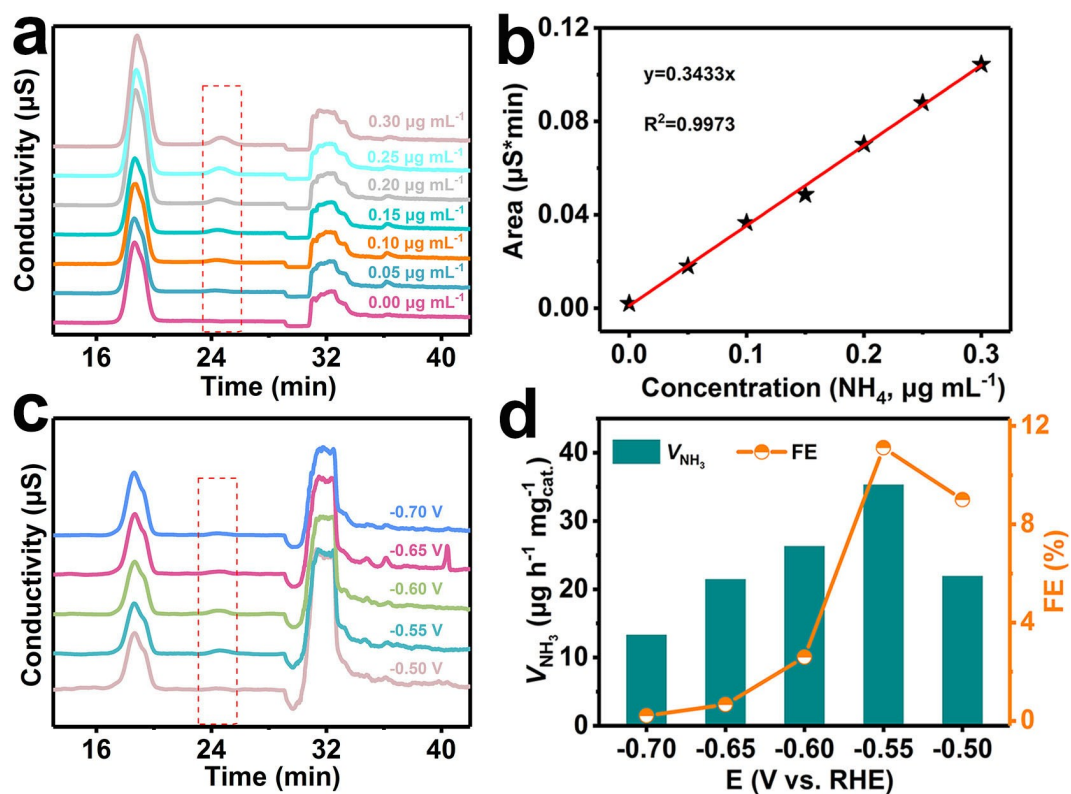

**Fig. S8.** (a) Ion chromatogram for the  $\text{NH}_4^+$  ions. (b) Calibration curve used for estimation of  $\text{NH}_4^+$ . (c) Ion chromatogram for the electrolytes at a series of potentials after electrolysis for 2 h. (d)  $V_{\text{NH}_3}$  and FEs for  $\text{MnO}_2\text{-Ti}_3\text{C}_2\text{T}_x/\text{CP}$  at corresponding potentials.

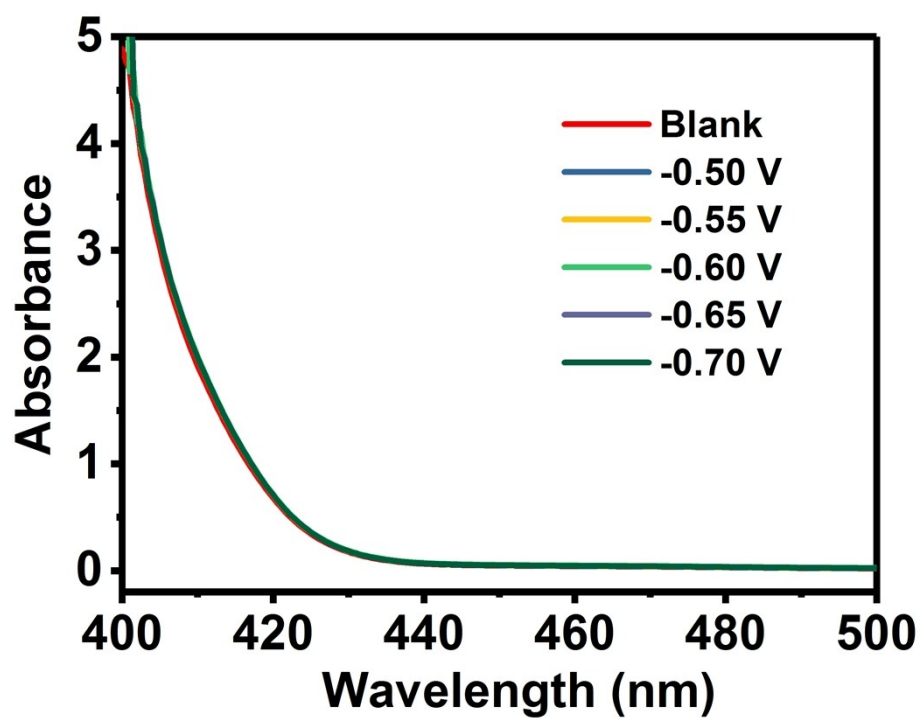

**Fig. S9.** UV–Vis spectra of the electrolyte estimated by the method of Watt and Chrisp before and after 2 h electrolysis in N<sub>2</sub> atmosphere at a series of potentials under ambient conditions.

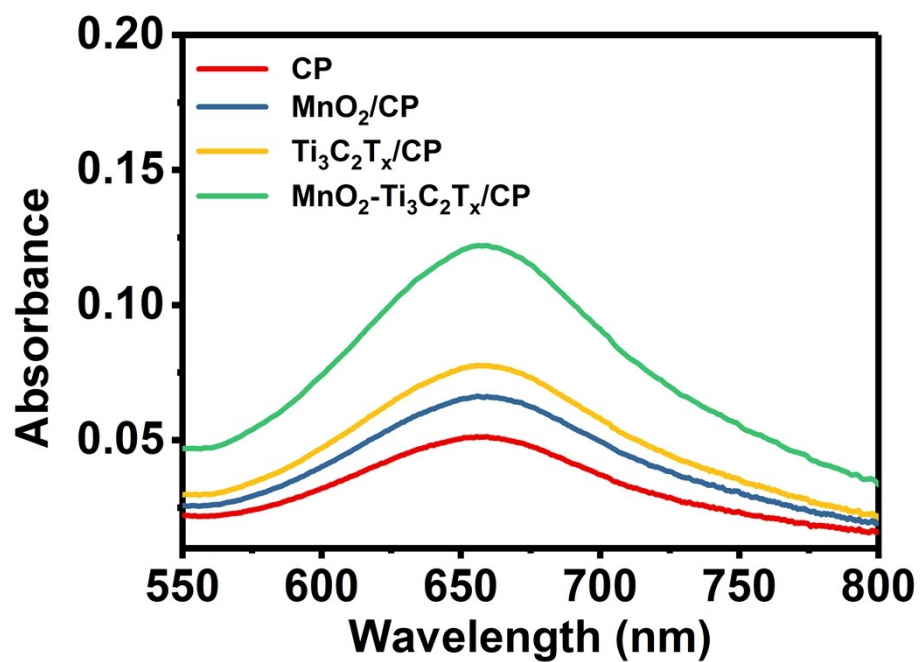

**Fig. S10.** UV-vis absorption spectra of the electrolytes stained with indophenol indicator after 2 h electrolysis in N<sub>2</sub>-saturated solution at -0.55 V using CP, MnO<sub>2</sub>/CP, Ti<sub>3</sub>C<sub>2</sub>T<sub>x</sub>/CP, and MnO<sub>2</sub>-Ti<sub>3</sub>C<sub>2</sub>T<sub>x</sub>/CP as the working electrode, respectively.

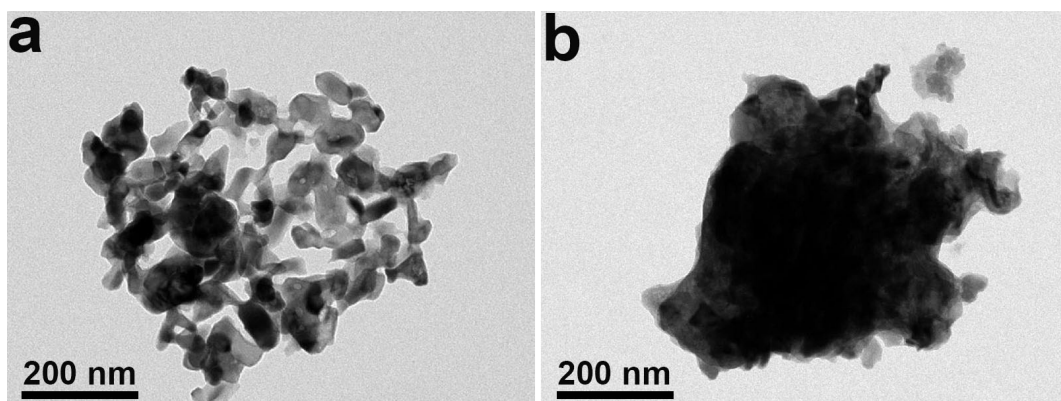

**Fig. S11.** TEM images of MnO<sub>2</sub> (a) before and (b) after 2 h electrolysis.

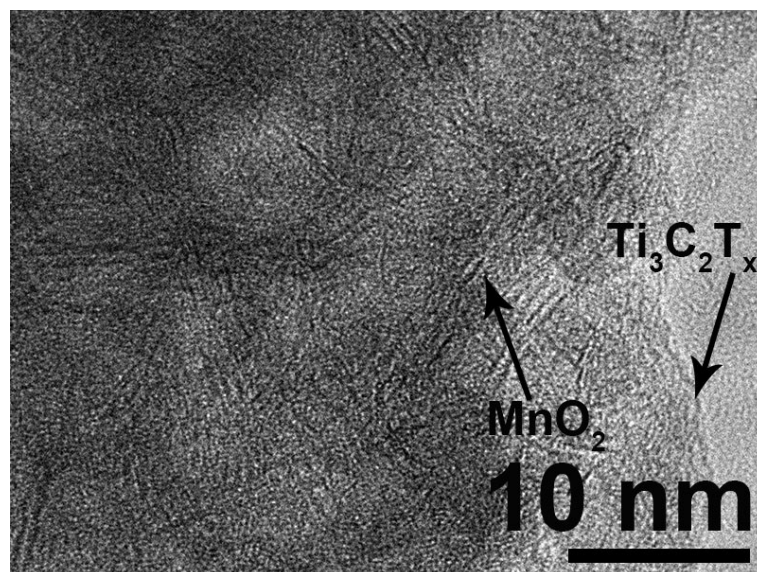

**Fig. S12.** TEM image of  $\text{MnO}_2\text{-Ti}_3\text{C}_2\text{T}_x$  after long-term electrocatalysis.



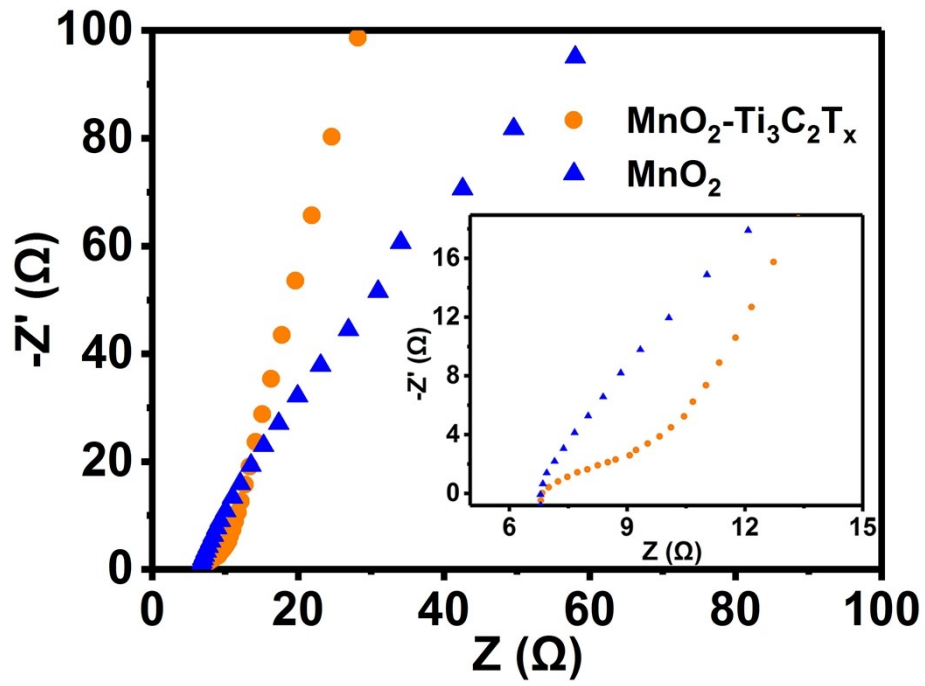

Fig. S13. Nyquist plots of  $\text{MnO}_2\text{-Ti}_3\text{C}_2\text{T}_x$  and  $\text{MnO}_2$ .

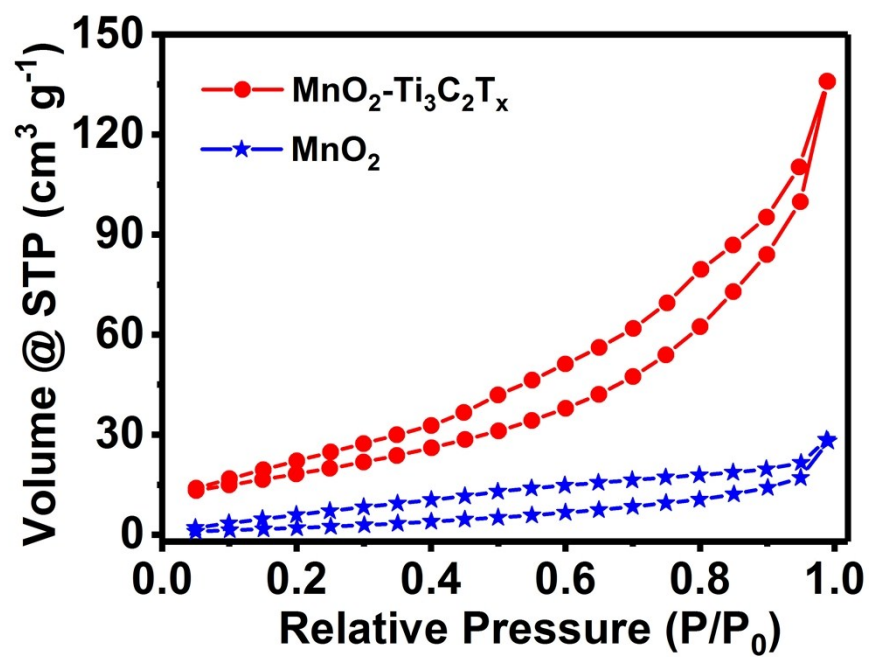

Fig. S14. N<sub>2</sub> adsorption-desorption isotherms of MnO<sub>2</sub>-Ti<sub>3</sub>C<sub>2</sub>T<sub>x</sub> and MnO<sub>2</sub>.

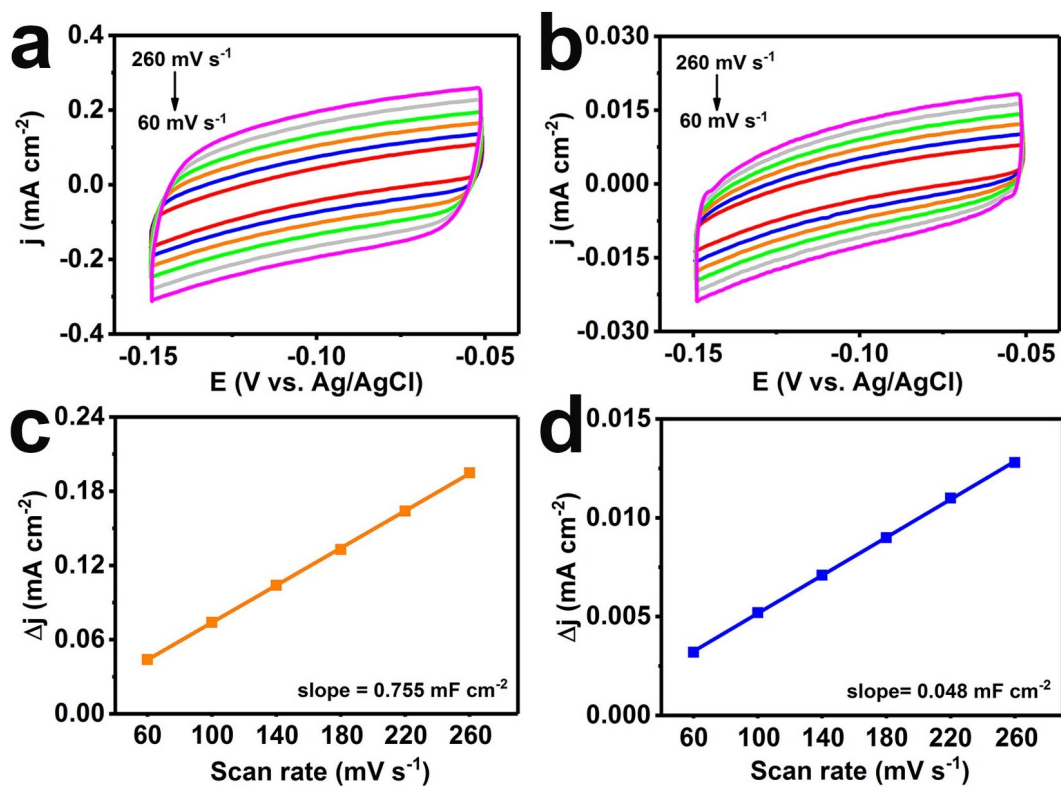

**Fig. S15.** CVs of (a) MnO<sub>2</sub>-Ti<sub>3</sub>C<sub>2</sub>T<sub>x</sub>/CP and (b) MnO<sub>2</sub>/CP at various scan rates (60–260 mV s<sup>-1</sup>) in the region of -0.05 to -0.15 V vs. Ag/AgCl. The capacitive current densities at -0.10 V vs. Ag/AgCl as a function of scan rates for (c) MnO<sub>2</sub>-Ti<sub>3</sub>C<sub>2</sub>T<sub>x</sub>/CP and (d) MnO<sub>2</sub>/CP.

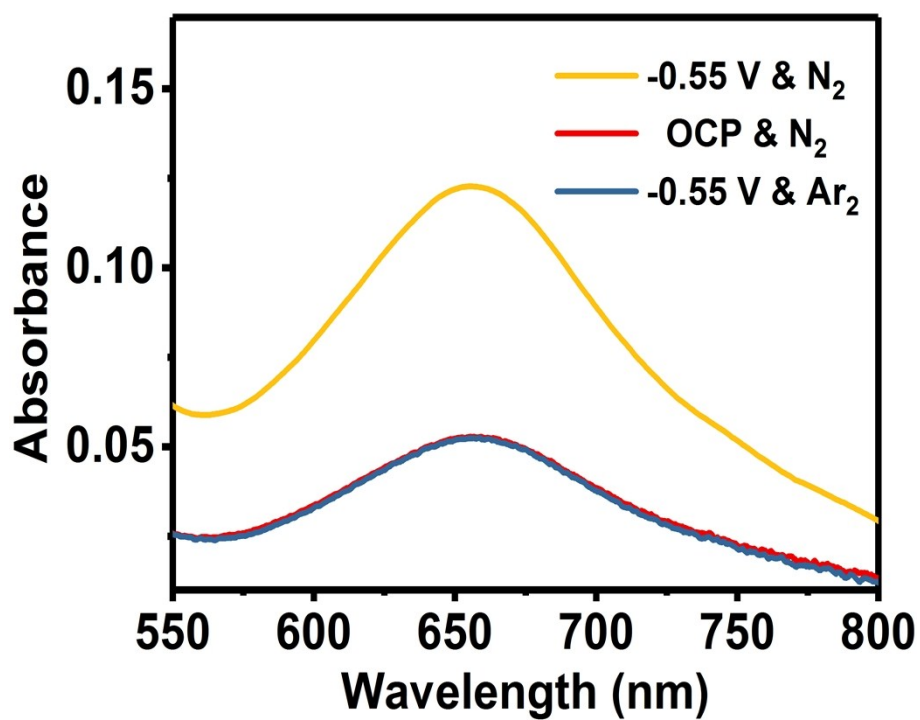

**Fig. S16.** UV-Vis absorption spectra of the electrolytes stained with indophenol indicator after 2 h electrolysis: in N<sub>2</sub>-saturated solution at the potential of  $-0.55$  V, N<sub>2</sub>-saturated solution at an open-circuit potential and in Ar-saturated solution at  $-0.55$  V.

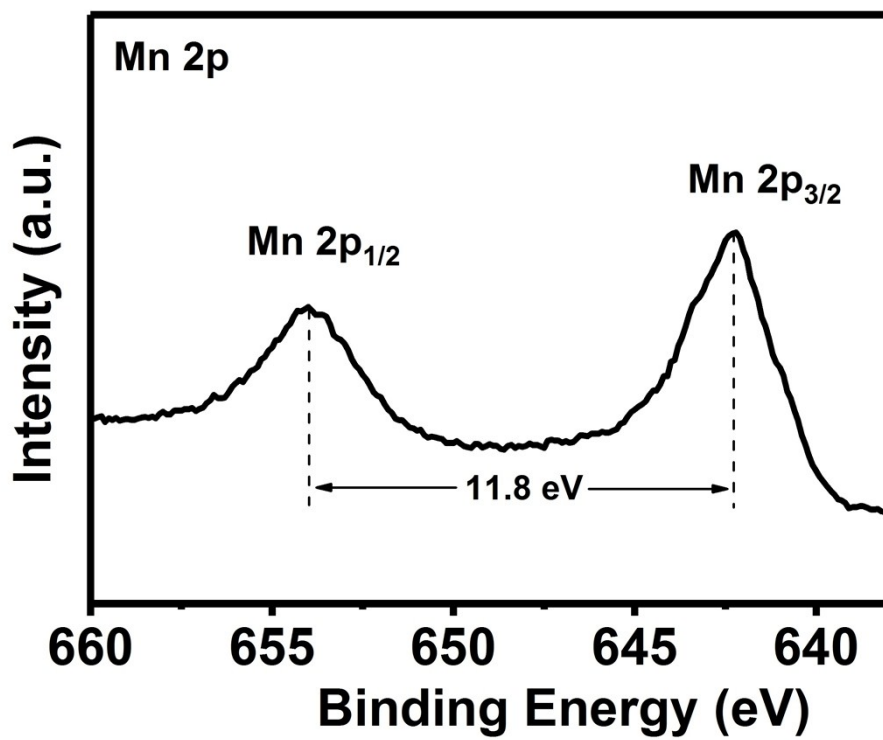

**Fig. S17.** XPS spectra for MnO<sub>2</sub>-Ti<sub>3</sub>C<sub>2</sub>T<sub>x</sub> in the Mn 2p regions after long-term stability test.

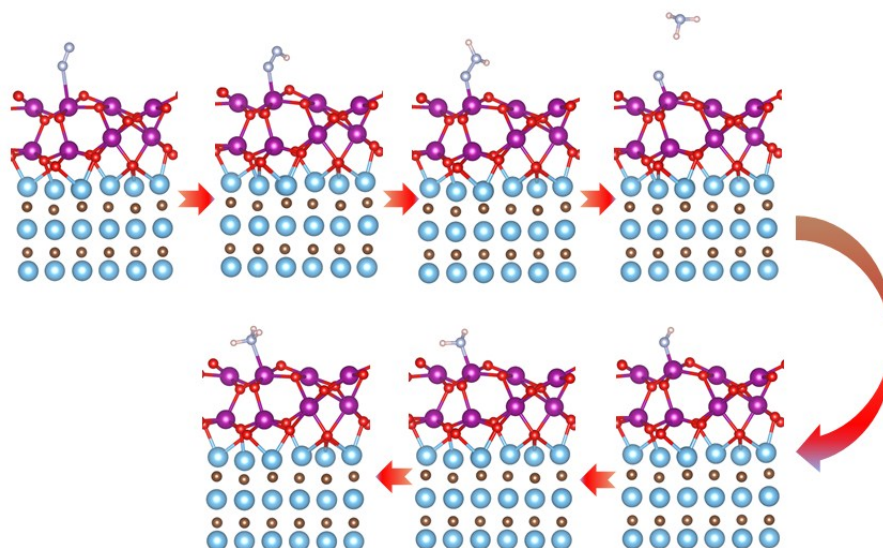

**Fig. S18.** Optimized structures of the intermediate species for the distal coordinate of MnO<sub>2</sub>-Ti<sub>3</sub>C<sub>2</sub>T<sub>x</sub> composite.

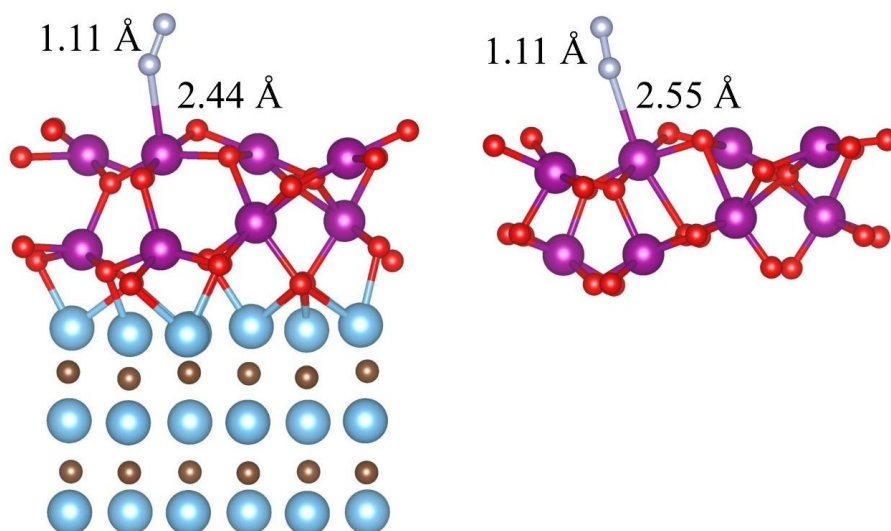

**Fig. S19.** Gibbs energy profile for the  $\text{N}_2$  reduction process, performed on  $\text{MnO}_2(110)$ -MXene surface, through traditional distal pathway.

**Table S1.** Comparison of the NH<sub>3</sub> electrosynthesis activity for MnO<sub>2</sub>-Ti<sub>3</sub>C<sub>2</sub>T<sub>x</sub> with other aqueous-based NRR electrocatalysts at ambient conditions.

| Catalyst                                                        | Electrolyte                           | NH <sub>3</sub> yield rate                                  | FE (%) | Ref.      |
|-----------------------------------------------------------------|---------------------------------------|-------------------------------------------------------------|--------|-----------|
| MnO <sub>2</sub> -Ti <sub>3</sub> C <sub>2</sub> T <sub>x</sub> | 0.1 M HCl                             | 34.12 μg h <sup>-1</sup> mg <sub>cat.</sub> <sup>-1</sup>   | 11.39  | This work |
| Ti <sub>3</sub> C <sub>2</sub> T <sub>x</sub> /TiO <sub>2</sub> | 0.1 M HCl                             | 32.17 μg h <sup>-1</sup> mg <sub>cat.</sub> <sup>-1</sup>   | 16.07  | 10        |
| Ti <sub>3</sub> C <sub>2</sub> T <sub>x</sub> nanosheet         | 0.1 M HCl                             | 20.4 μg h <sup>-1</sup> mg <sub>cat.</sub> <sup>-1</sup>    | 9.3    | 11        |
| Ag nanosheet                                                    | 0.1 M HCl                             | 4.62×10 <sup>-11</sup> mol s <sup>-1</sup> cm <sup>-2</sup> | 4.8    | 12        |
| C-TiO <sub>2</sub>                                              | 0.1 M Na <sub>2</sub> SO <sub>4</sub> | 16.22 μg h <sup>-1</sup> mg <sub>cat.</sub> <sup>-1</sup>   | 1.84   | 13        |
| MoS <sub>2</sub>                                                | 0.1 M Na <sub>2</sub> SO <sub>4</sub> | 8.8×10 <sup>-11</sup> mol s <sup>-1</sup> cm <sup>-2</sup>  | 1.17   | 14        |
| MoN                                                             | 0.1 M HCl                             | 3.01×10 <sup>-10</sup> mol s <sup>-1</sup> cm <sup>-2</sup> | 1.15   | 15        |
| VN                                                              | 0.1 M HCl                             | 8.4×10 <sup>-11</sup> mol s <sup>-1</sup> cm <sup>-2</sup>  | 2.25   | 16        |
| N-doped porous carbon                                           | 0.1 M HCl                             | 15.7 μg h <sup>-1</sup> mg <sub>cat.</sub> <sup>-1</sup>    | 1.45   | 17        |
| hollow Cr <sub>2</sub> O <sub>3</sub> microspheres              | 0.1 M Na <sub>2</sub> SO <sub>4</sub> | 25.3 μg h <sup>-1</sup> mg <sub>cat.</sub> <sup>-1</sup>    | 6.78   | 18        |
| TiO <sub>2</sub> -rGO                                           | 0.1 M Na <sub>2</sub> SO <sub>4</sub> | 15.13 μg h <sup>-1</sup> mg <sub>cat.</sub> <sup>-1</sup>   | 3.3    | 19        |
| Au nanorods                                                     | 0.1 M KOH                             | 1.648 μg h <sup>-1</sup> cm <sup>-2</sup>                   | 4      | 20        |
| Fe <sub>2</sub> O <sub>3</sub> nanorods                         | 0.1 M Na <sub>2</sub> SO <sub>4</sub> | 15.9 μg h <sup>-1</sup> mg <sub>cat.</sub> <sup>-1</sup>    | 0.94   | 21        |
| defect-rich MoS <sub>2</sub> nanoflower                         | 0.1 M Na <sub>2</sub> SO <sub>4</sub> | 29.28 μg h <sup>-1</sup> mg <sub>cat.</sub> <sup>-1</sup>   | 8.34   | 22        |
| Mn <sub>3</sub> O <sub>4</sub> nanocube                         | 0.1 M Na <sub>2</sub> SO <sub>4</sub> | 11.6 μg h <sup>-1</sup> mg <sub>cat.</sub> <sup>-1</sup>    | 3.0    | 23        |
| Mn <sub>3</sub> O <sub>4</sub> nanoparticles@rGO                | 0.1 M Na <sub>2</sub> SO <sub>4</sub> | 17.4 μg h <sup>-1</sup> mg <sub>cat.</sub> <sup>-1</sup>    | 3.52   | 24        |
| MnO                                                             | 0.1 M Na <sub>2</sub> SO <sub>4</sub> | 1.11×10 <sup>-10</sup> mol s <sup>-1</sup> cm <sup>-2</sup> | 8.02   | 25        |
| PCN                                                             | 0.1 M HCl                             | 8.09 μg h <sup>-1</sup> mg <sub>cat.</sub> <sup>-1</sup>    | 11.59  | 26        |
| γ-Fe <sub>2</sub> O <sub>3</sub>                                | 0.1 M KOH                             | 12.5 nmol h <sup>-1</sup> cm <sup>-2</sup>                  | 1.9    | 27        |
| MoO <sub>3</sub>                                                | 0.1 M HCl                             | 29.43 μg h <sup>-1</sup> mg <sub>cat.</sub> <sup>-1</sup>   | 1.9    | 28        |
| MnO <sub>2</sub> with oxygen vacancies                          | 0.1 M Na <sub>2</sub> SO <sub>4</sub> | 1.63×10 <sup>-10</sup> mol s <sup>-1</sup> cm <sup>-2</sup> | 11.40  | 29        |
| Au nanorods                                                     | 0.1 KOH                               | 1.648 μg h <sup>-1</sup> cm <sup>-2</sup>                   | 4      | 30        |
| d-TiO <sub>2</sub>                                              | 0.1 M HCl                             | 1.24×10 <sup>-10</sup> mol s <sup>-1</sup> cm <sup>-2</sup> | 9.17   | 31        |



## References

- 1 M. Ghidui, M. R. Lukatskaya, M. Q. Zhao, Y. Gogotsi and M. W. Barsoum, *Nature*, 2014, **516**, 78–81.
- 2 K. Maleski, C. E. Ren, M. Zhao, B. Anasori and Y. Gogotsi, *ACS Appl. Mater. Interfaces*, 2018, **29**, 24491–24498.
- 3 R. B. Rakhi, B. Ahmed, D. H. Anjum and H. N. Alshareef, *ACS Appl. Mater. Interfaces*, 2016, **29**, 18806–18814.
- 4 D. Zhu, L. Zhang, R. E. Ruther and R. J. Hamers, *Nat. Mater.*, 2013, **12**, 836–841.
- 5 G. W. Watt and J. D. Chrisp, *Anal. Chem.*, 1952, **24**, 2006–2008.
- 6 P. E. Blöchl, *Phys. Rev. B*, 1994, **50**, 17953–17979.
- 7 G. Kresse and D. Joubert, *Phys. Rev. B*, 1999, **9**, 1758–1775.
- 8 M. C. Payne, M. P. Teter, D. C. Allan, T. A. Arias and J. D. Joannopoulos, *Rev. Mod. Phys.*, 1992, **64**, 1045–1097.
- 9 F. Gong, Z. Ding, Y. Fang, C. Tong, D. Xia, Y. Lv, B. Wang, D. V. Papavassiliou, J. Liao and M. Wu, *ACS Appl. Mater. Interfaces*, 2018, **10**, 14614–14621.
- 10 Y. Fang, Z. Liu, J. Han, Z. Jin, Y. Han, F. Wang, Y. Niu, Y. Wu and Y. Xu, *Adv. Energy Mater.*, 2019, **9**, 1803406.
- 11 J. Zhao, L. Zhang, X. Xie, X. Li, Y. Yong, Q. Liu, W. Fang, X. Shi, G. Cui and X. Sun, *J. Mater. Chem. A*, 2018, **6**, 24031–24035.
- 12 H. Huang, L. Xia, X. Shi, A. M. Asiri and X. Sun, *Chem. Commun.*, 2018, **54**, 11427–11430.
- 13 K. Jia, Y. Wang, Q. Pan, B. Zhong, Y. Luo, G. Cui, X. Guo and X. Sun, *Nanoscale Adv.*, 2019, **1**, 961–964.
- 14 L. Zhang, X. Ji, X. Ren, Y. Ma, X. Shi, Z. Tian, A. M. Asiri, L. Chen, B. Tang and X. Sun, *Adv. Mater.*, 2018, **30**, 1800191.
- 15 L. Zhang, X. Ji, X. Ren, Y. Luo, X. Shi, A. M. Asiri, B. Zheng and X. Sun, *ACS Sustainable Chem. Eng.*, 2018, **6**, 9550–9554.
- 16 R. Zhang, Y. Zhang, X. Ren, G. Cui, A. M. Asiri, B. Zheng and X. Sun, *ACS*

- Sustainable Chem. Eng.*, 2018, **6**, 9545–9549.
- 17 X. Yang, K. Li, D. Cheng, W. Pang, J. Lv, X. Chen, H. Zang, X. Wu, H. Tan, Y. Wang and Y. Li, *J. Mater. Chem. A*, 2018, **6**, 7762–7769.
  - 18 Y. Zhang, W. Qiu, Y. Ma, Y. Luo, Z. Tian, G. Cui, F. Xie, L. Chen, T. Li and X. Sun, *ACS Catal.*, 2018, **8**, 8540–8544.
  - 19 X. Zhang, Q. Liu, X. Shi, A. M. Asiri, Y. Luo, X. Sun and T. Li, *J. Mater. Chem. A*, 2018, **6**, 17303–17306.
  - 20 D. Bao, Q. Zhang, F. Meng, H. Zhong, M. Shi, Y. Zhang, J. Yan, Q. Jiang and X. Zhang, *Adv. Mater.*, 2017, **29**, 1604799.
  - 21 X. Xiang, Z. Wang, X. Shi, M. Fan and X. Sun, *ChemCatChem.*, 2018, **20**, 4530–4535.
  - 22 X. Li, T. Li, Y. Ma, Q. Wei, W. Qiu, H. Guo, X. Shi, P. Zhang, A. M. Asiri, L. Chen, B. Tang and X. Sun, *Adv. Energy Mater.*, 2018, **8**, 1801357.
  - 23 X. Wu, L. Xia, Y. Wang, W. Lu, Q. Liu, X. Shi and X. Sun, *Small*, 2018, **14**, 1803111.
  - 24 H. Huang, F. Gong, Y. Wang, H. Wang, X. Wu, W. Lu, R. Zhao, H. Chen, X. Shi, A. M. Asiri, T. Li, Q. Liu and X. Sun, *Nano Res.*, 2019, DOI: 10.1007/s12274-019-2352-5.
  - 25 Z. Wang, F. Gong, L. Zhang, R. Wang, L. Ji, Q. Liu, Y. Luo, H. Guo, Y. Li, P. Gao, X. Shi, B. Li, B. Tang and X. Sun, *Adv. Sci.*, 2018, **5**, 1801182.
  - 26 C. Lv, Y. Qian, C. Yan, Y. Ding, Y. Liu, G. Chen and G. Yu, *Angew. Chem. Int. Ed.*, 2018, **57**, 10246–10250.
  - 27 J. Kong, A. Lim, C. Yoon, J. H. Jang, H. C. Ham, J. Han, S. Nam, D. Kim, Y. Sung, J. Choi and H. S. Park, *ACS Sustainable Chem. Eng.*, 2017, **5**, 10986–10995.
  - 28 J. Han, X. Ji, X. Ren, G. Cui, L. Li, F. Xie, H. Wang, B. Li and X. Sun, *J. Mater. Chem. A*, 2018, **6**, 12974–12977.
  - 29 L. Zhang, X. Xie, H. Wang, L. Ji, Y. Zhang, H. Chen, T. Li, Y. Luo, G. Cui and X. Sun, *Chem. Commun.*, 2019, **55**, 4627–4630.
  - 30 D. Bao, Q. Zhang, F. Meng, H. Zhong, M. Shi, Y. Zhang, J. Yan, Q. Jiang and X. Zhang, *Adv. Mater.*, 2017, **29**, 1604799.
  - 31 L. Yang, T. Wu, R. Zhang, H. Zhou, L. Xia, X. Shi, H. Zheng, Y. Zhang and X. Sun,

*Nanoscale*, 2019, **11**, 1555–1562.
